# Supplementary material for: Assessment of Mediterranean Citrus Peel Flavonoids and Their Antioxidant Capacity Using an Innovative UV-Vis Spectrophotometric Approach
Source: MDPI journal article supplement (doi:10.3390/plants12234046), 2023-11-30
Supplement: s1 [file s1]

## Supplementary Figures

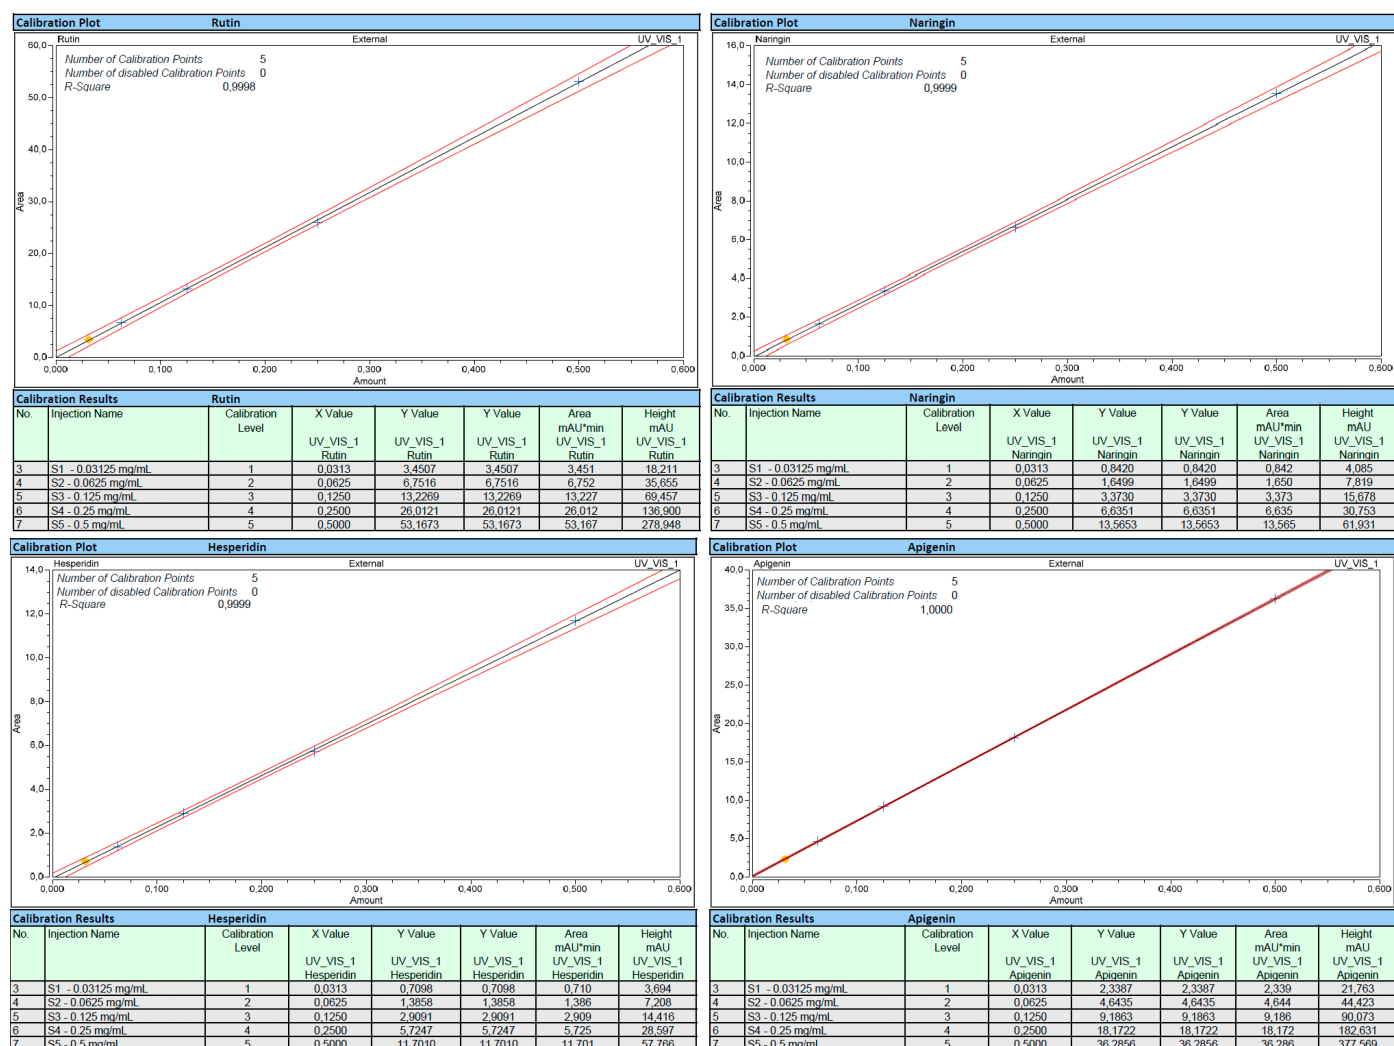

**Supplemental Figure S1.** HPLC calibration curves obtained with standard solutions of rutin, naringin, hesperidin and apigenin. Minimum concentration 31,25 ppm and maximum concentration 500 ppm –  $r^2 > 0.998$  in all cases.

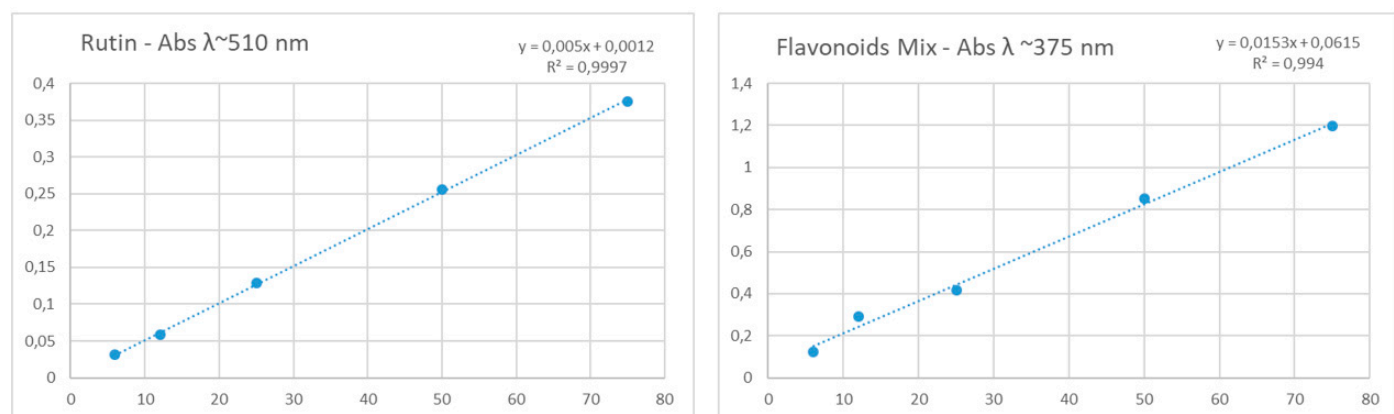

**Supplemental Figure S2.** Spectrophotometric calibration curve calculated with absorbance values obtained using rutin standard solution ( $\lambda \sim 510$  nm) or a mixture of naringin, rutin, apigenin and hesperidin in weight ratio 1:1:1:1 ( $\lambda \sim 375$  nm). Minimum concentration 6  $\mu$ g/mL and maximum concentration 75  $\mu$ g/mL –  $r^2 > 0.99$  in both cases.
